# Supplementary material for: Plasmatic exosome-derived circRNAs panel act as fingerprint for glioblastoma
Source: publisher site journal article supplement (doi:10.18632/aging.203368), 2021-08-12
Supplement: Supplementary file [file aging-v13i15-203368-supplementary-material-SD1.pdf]

SUPPLEMENTARY MATERIALS

Supplementary Figure

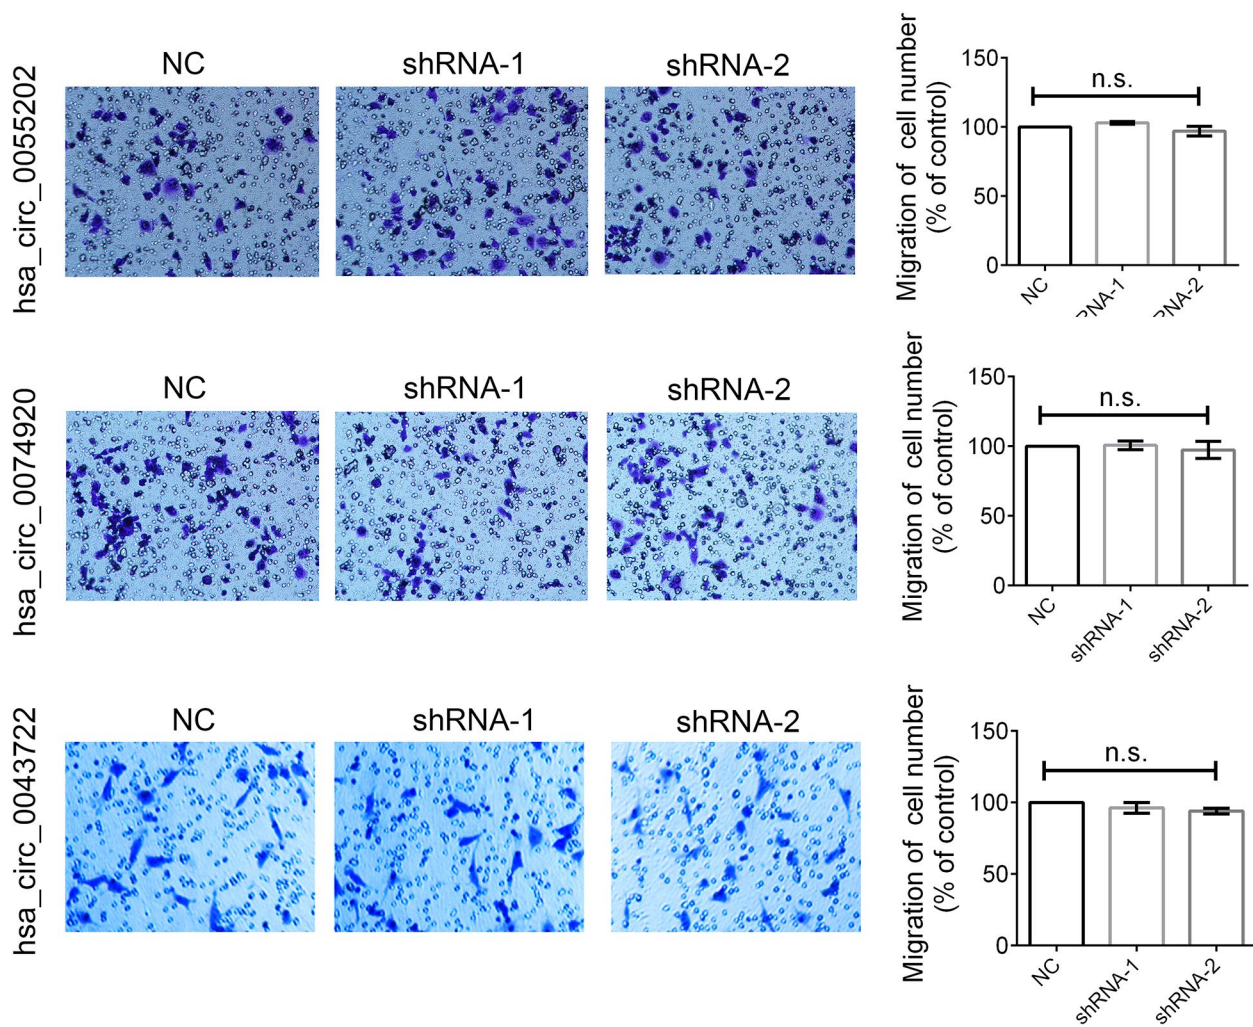

Supplementary Figure 1. The hsa\_circ\_0055202, hsa\_circ\_0074920 and hsa\_circ\_0043722 promoted cell proliferation of GBM cell lines was not involved in cell invasion. n.s. indicated no significant.
